# Supplementary material for: Oral-only antibiotics for bone and joint infections in children: study protocol for a nationwide randomised open-label non-inferiority trial
Source: PubMed Central journal article supplement — BMJ Open. 2023 Jun 1;13(6):e072622. doi: 10.1136/bmjopen-2023-072622 (PMC10254855; doi:10.1136/bmjopen-2023-072622), 2023-06-01
Supplement: bmjopen-2023-072622supp003.pdf [file bmjopen-2023-072622supp003.pdf]

### APPENDIX 3: Trial registration data set

| DATA CATEGORY                                 | INFORMATION                                                                                                                                                                                                                                                                                                                                                                                              |
|-----------------------------------------------|----------------------------------------------------------------------------------------------------------------------------------------------------------------------------------------------------------------------------------------------------------------------------------------------------------------------------------------------------------------------------------------------------------|
| Primary registry and trial identifying number | ClinicalTrials.gov: NCT04563325                                                                                                                                                                                                                                                                                                                                                                          |
| Date of registration in primary registry      | 18th September 2020                                                                                                                                                                                                                                                                                                                                                                                      |
| Secondary identifying numbers                 | H-20009117 (The Ethics Committee of the Capital Region of Denmark)                                                                                                                                                                                                                                                                                                                                       |
| Source(s) of monetary or material support     | Copenhagen University Hospital Rigshospitalet                                                                                                                                                                                                                                                                                                                                                            |
| Primary sponsor                               | Copenhagen University Hospital Rigshospitalet, Ulrikka Nygaard                                                                                                                                                                                                                                                                                                                                           |
| Secondary sponsor(s)                          | N/A                                                                                                                                                                                                                                                                                                                                                                                                      |
| Contact for public queries                    | Allan Bybeck Nielsen<br>allan.bybeck.nielsen@regionh.dk                                                                                                                                                                                                                                                                                                                                                  |
| Contact for scientific queries                | Allan Bybeck Nielsen<br>allan.bybeck.nielsen@regionh.dk                                                                                                                                                                                                                                                                                                                                                  |
| Public title                                  | ORAL-ONLY ANTIBIOTICS FOR BONE AND JOINT INFECTIONS IN CHILDREN                                                                                                                                                                                                                                                                                                                                          |
| Scientific title                              | ORAL-ONLY ANTIBIOTICS FOR BONE AND JOINT INFECTIONS IN CHILDREN - A nationwide randomized open-label non-inferiority trial.                                                                                                                                                                                                                                                                              |
| Countries of recruitment                      | Denmark                                                                                                                                                                                                                                                                                                                                                                                                  |
| Health condition(s) or problem(s) studied     | Antibiotic treatment of bone and joint infections in children and adolescents                                                                                                                                                                                                                                                                                                                            |
| Intervention(s)                               | Standard: IV + oral antibiotic treatment vs. Experimental: Oral only antibiotic treatment.                                                                                                                                                                                                                                                                                                               |
| Key inclusion and exclusion criteria          | Inclusion:<br>- Age 3 months to 18 years<br>- Antibiotic therapy for bone or joint infection.<br>Exclusion:<br>- Severe disease at admission<br>- Complicated bone or joint infection<br>- Expected need of major surgery within the first 24 hours of treatment<br>- Significant co-morbidities<br>- Previous bone or joint infection.<br>- Antibiotic therapy for more than 24 hours before inclusion. |
| Study type                                    | Open label, randomized 1:1, non-inferiority trial. Investigator of the primary endpoint is blinded to treatment allocation.                                                                                                                                                                                                                                                                              |
| Date of first enrolment                       | Sep 2020                                                                                                                                                                                                                                                                                                                                                                                                 |
| Target sample size                            | 180                                                                                                                                                                                                                                                                                                                                                                                                      |
| Recruitment status                            | Recruiting                                                                                                                                                                                                                                                                                                                                                                                               |
| Primary outcome                               | Proportion of children with sequelae 6 months after initiation of treatment defined as abnormal mobility or function of the affected joint/bone. Evaluated by blinded clinical examination by a qualified pediatrician and/or pediatric orthopedic surgeon.                                                                                                                                              |
| Secondary outcomes                            | - Non acute treatment failure<br>- Recurrent infection                                                                                                                                                                                                                                                                                                                                                   |
